# Supplementary material
Source: Springer Nature journal article supplement (https://www.springermedizin.de/resource/supplementary/12903_2013_327_MOESM4_ESM.pdf/9516636)

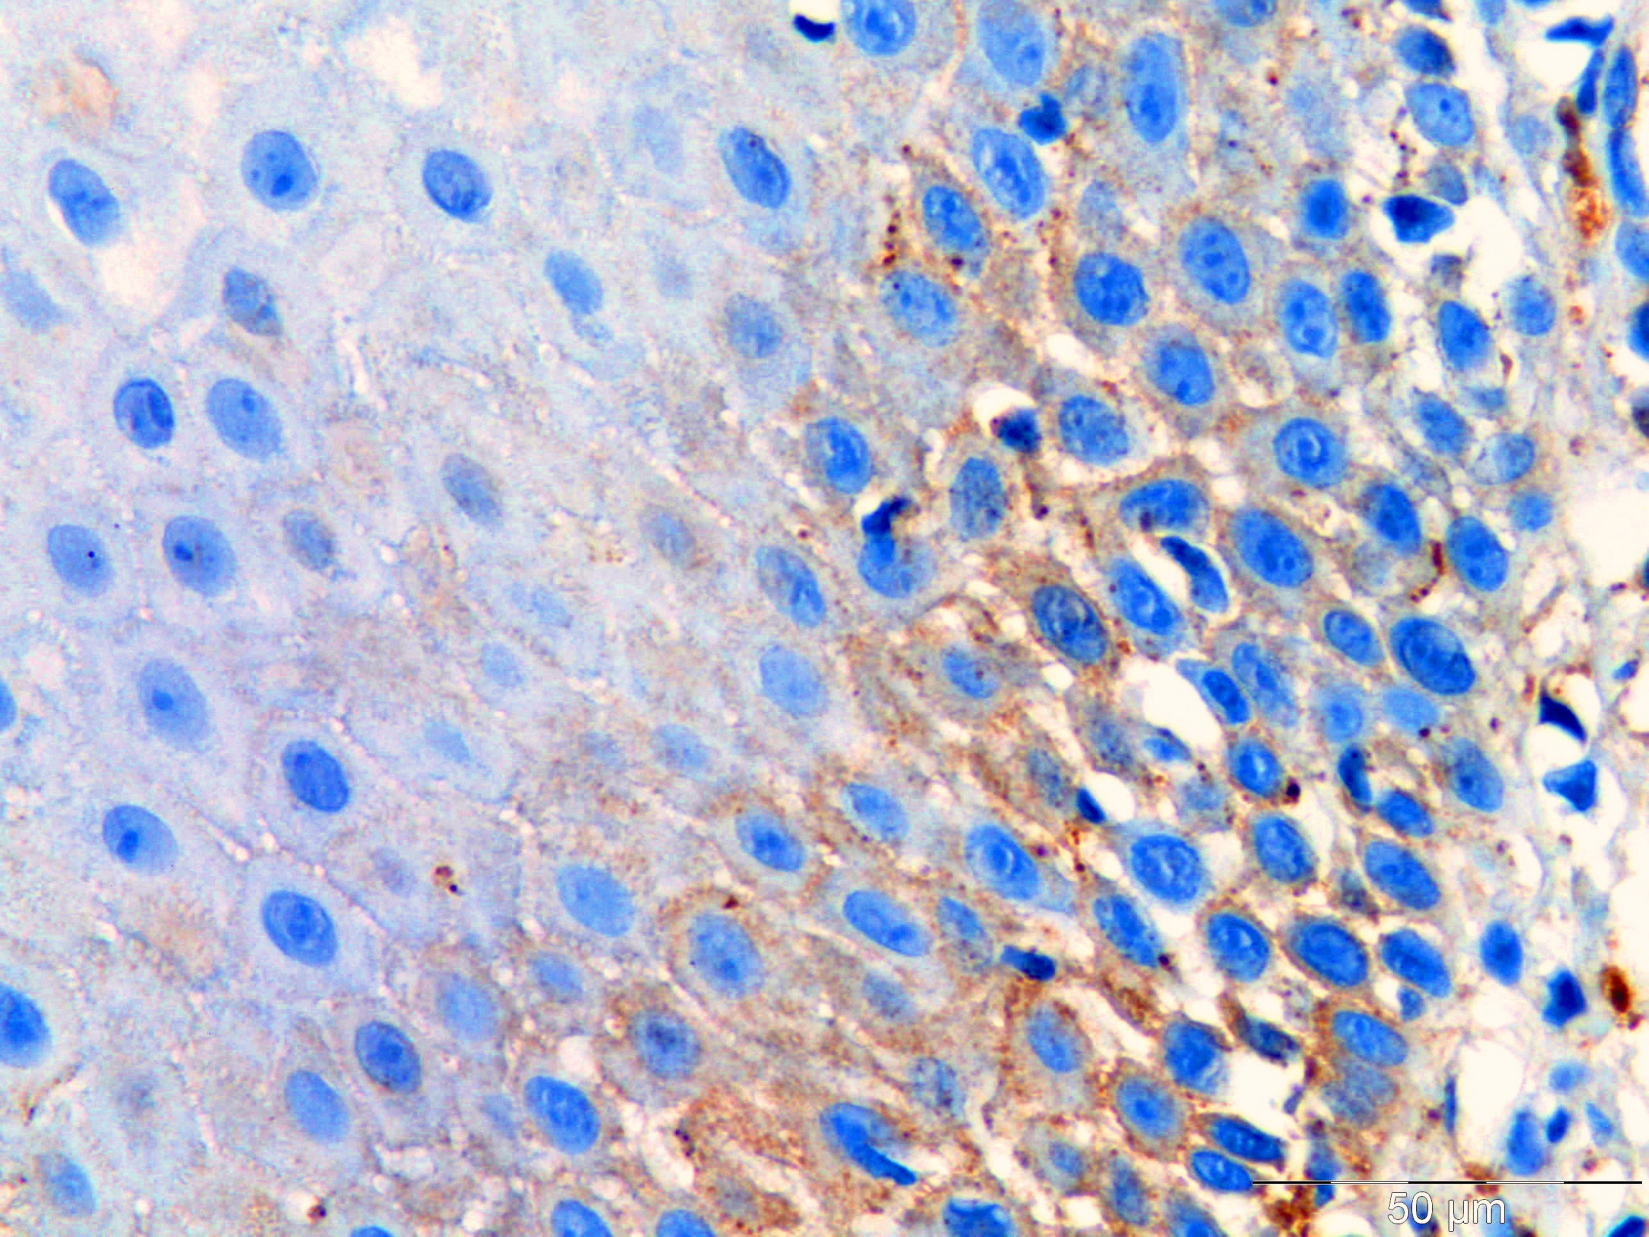

50  $\mu\text{m}$

Supplement: MOESM4 [file 9516636]
